# Supplementary material for: Assessment of Sentinel-3 Altimeter Performance over Antarctica using High Resolution Digital Elevation Models
Source: Copernicus journal article supplement (doi:10.5194/egusphere-2024-3054), 2024-10-25
Supplement: Supplementary file [file egusphere-2024-3054-AC1-supplement.pdf]

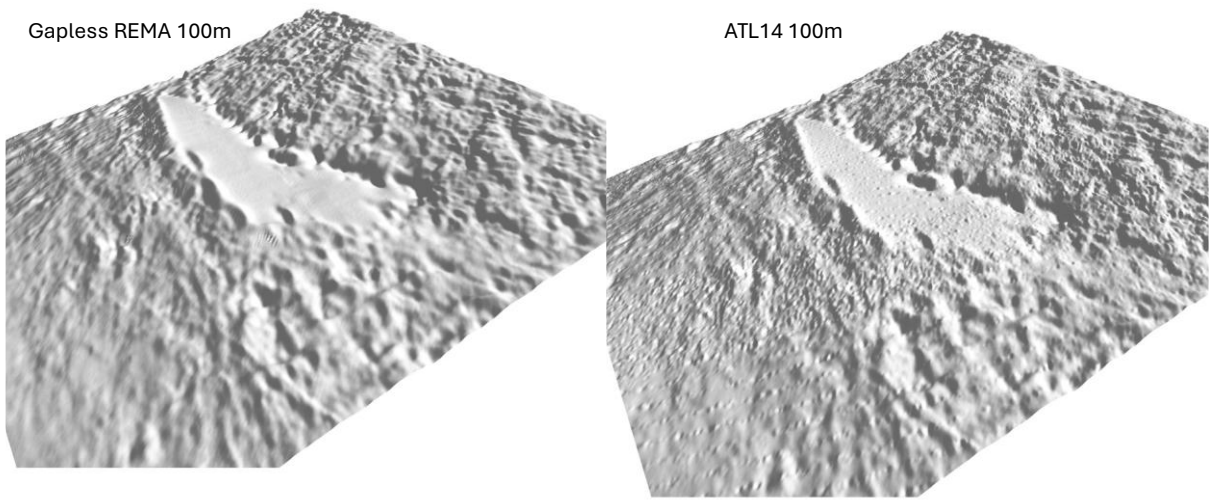

Figure 1.

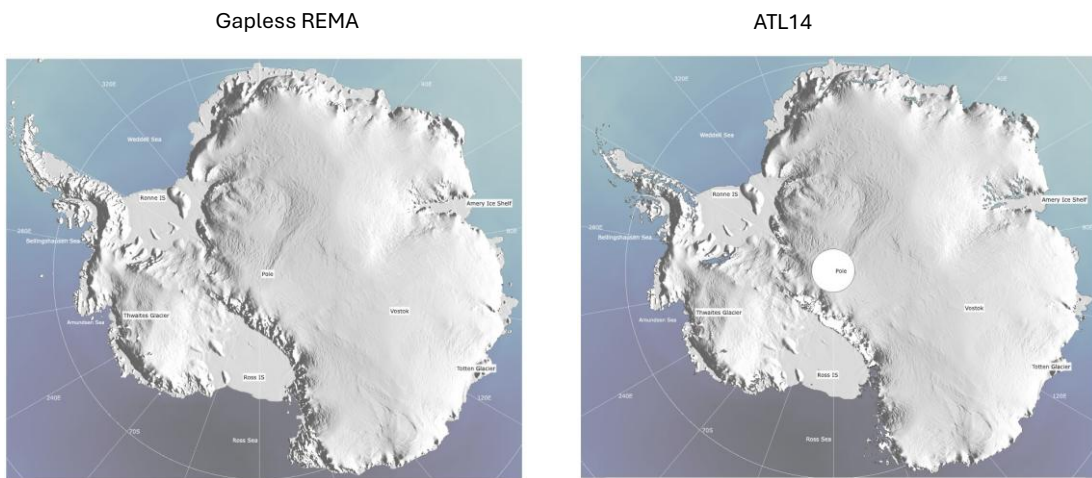

Figure 2.
