# Supplementary material for: Assessment of Sentinel-3 Altimeter Performance over Antarctica using High Resolution Digital Elevation Models
Source: Copernicus journal article supplement (doi:10.5194/egusphere-2024-3054), 2024-10-25
Supplement: Supplementary file [file egusphere-2024-3054-AC4-supplement.pdf]

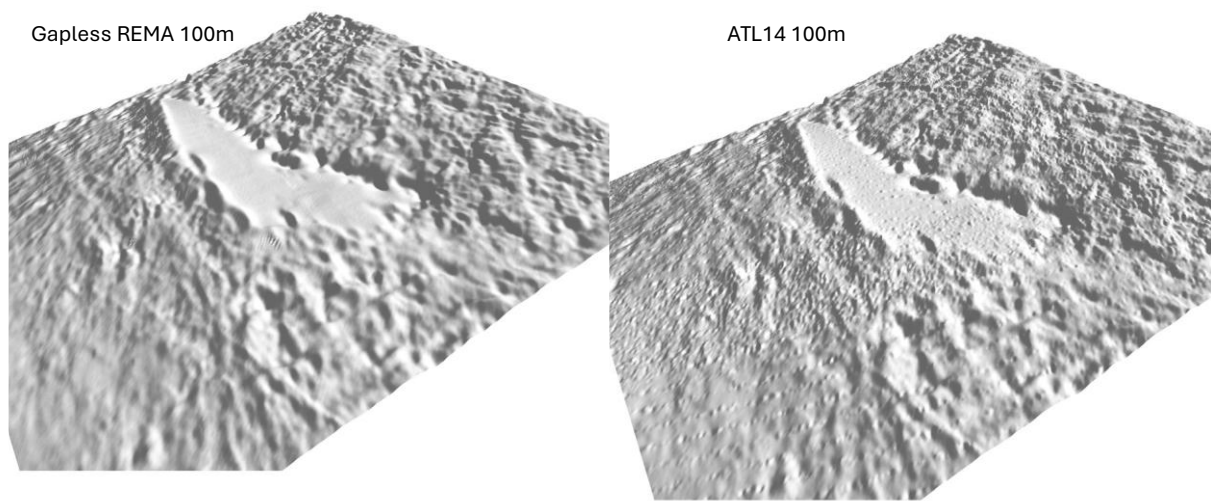

Figure 1.

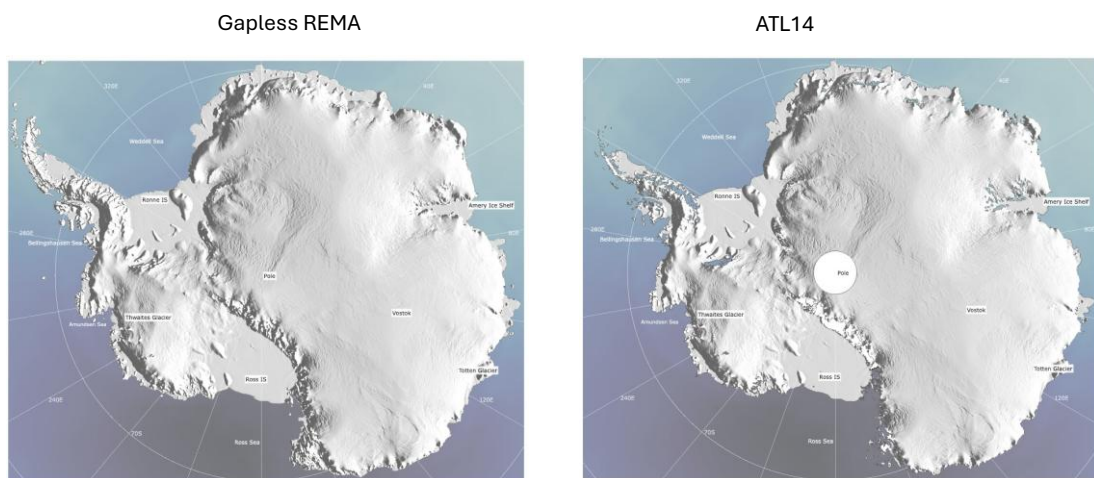

Figure 2.

Figures courtesy of:  
**Alan S. Muir,**  
 Centre for Polar Observation & Modelling,  
 Department of Earth Sciences,  
 University College London,  
 WC1E 6BT,  
 UK
